# Supplementary material
Source: PubMed Central journal article supplement (PMC6339462)
Supplement: NIHMS1507646-supplement-Supplemental_Figure_S2.pdf [file NIHMS1507646-supplement-Supplemental_Figure_S2.pdf]

# Clinical volume over time

█ All patients with ATAAD (n)
 █ Patients with IR-amenable MPS (upfront IR) (n)
 — Patients with IR-amenable MPS (upfront IR) (% of all)

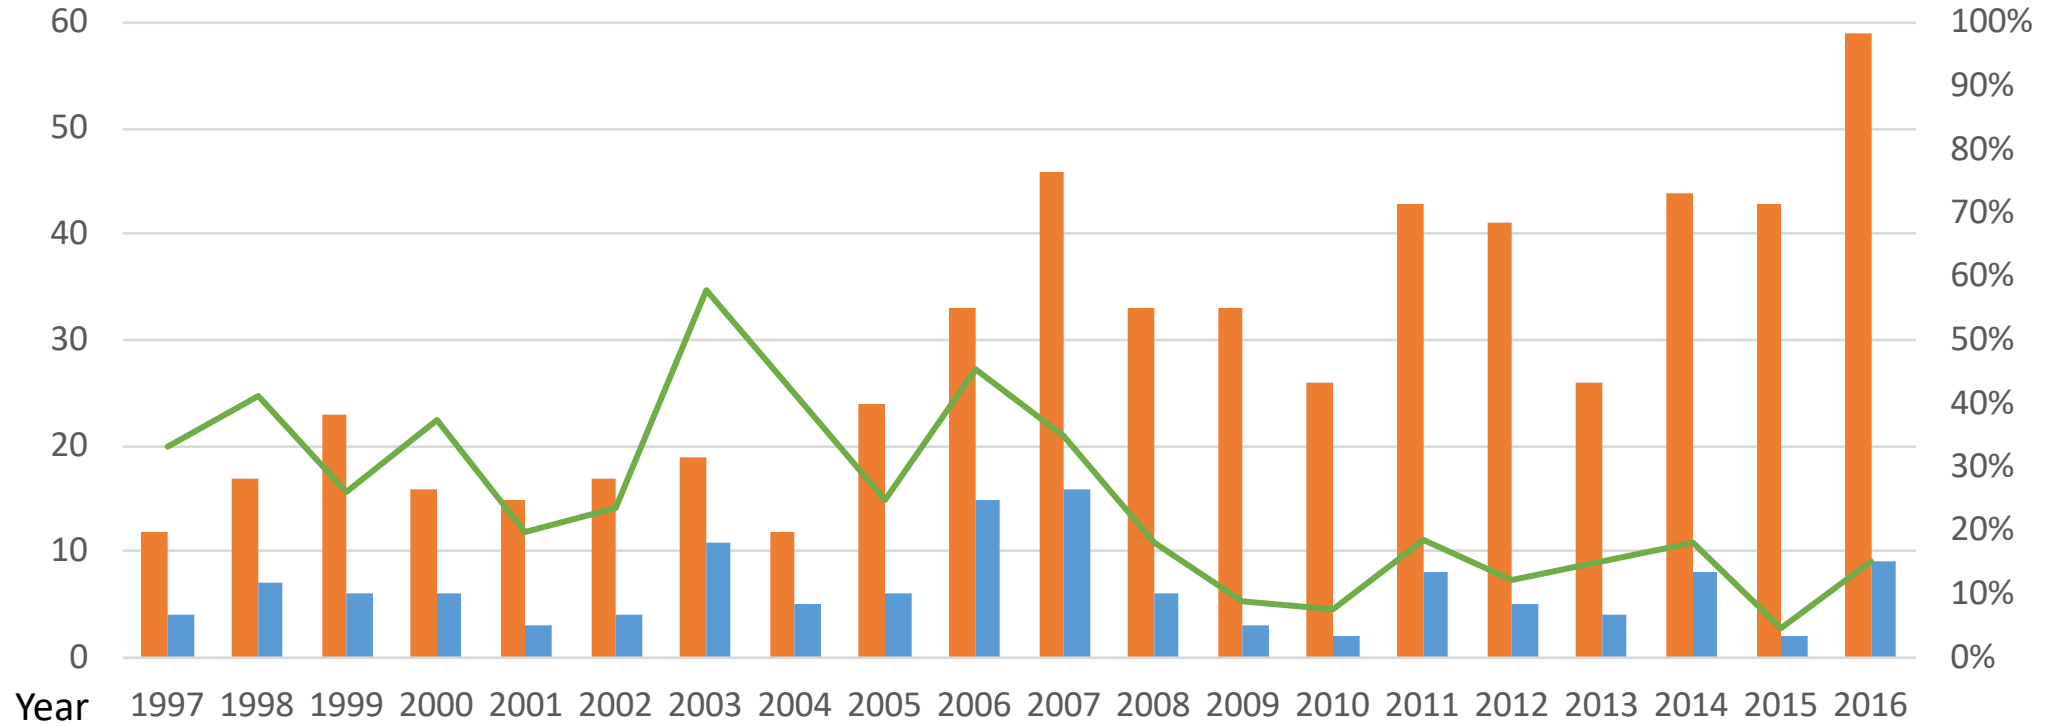

Non-therapeutic IR/all IR

4/4   2/7   0/6   2/6   0/3   1/4   2/11   3/5   1/6   1/15   1/16   0/6   0/3   1/2   2/8   0/5   1/4   0/8   0/2   0/9
