# Supplementary material
Source: PubMed Central journal article supplement (PMC6339462)
Supplement: NIHMS1507646-supplement-Supplemental_Tables_S1-S5_and_Figures_S1-S3.pdf [file NIHMS1507646-supplement-Supplemental_Tables_S1-S5_and_Figures_S1-S3.pdf]

# SUPPLEMENTAL MATERIAL

**Table S1. Details of endovascular interventions in 135\* patients with suspected malperfusion syndrome**

| Level of aortic fenestration/stenting | Aortic fenestration (n=93) | Aortic stenting (n=90) | Branch vessel fenestration (n=1) | Branch vessel stenting (n=95) |
|---------------------------------------|----------------------------|------------------------|----------------------------------|-------------------------------|
| Head vessels**                        | -                          | -                      | 0                                | 2                             |
| Descending thoracic                   | 0                          | 1                      | -                                | -                             |
| Supraceliac                           | 21                         | 23                     | -                                | -                             |
| Celiac                                | 16                         | 0                      | 0                                | 4                             |
| Supramesenteric                       | 38                         | 52                     | -                                | -                             |
| Mesenteric                            | 11                         | 0                      | 0                                | 42                            |
| Suprarenal                            | 4                          | 4                      | -                                | -                             |
| Renal                                 | 14                         | 6                      | 0                                | 30                            |
| Infrarenal                            | 40                         | 62                     | -                                | -                             |
| Iliac                                 | -                          | -                      | 1                                | 57                            |

\* Only 112/135 patients underwent fenestration and/or stenting in interventional radiology (IR); 23 patients had non-therapeutic IR.

\*\* We performed innominate artery and carotid artery stenting in two patients, of whom, one had concurrent right upper extremity MPS and the other one had renal MPS. MPS = malperfusion syndrome.

**Table S2. Pre-existing comorbidities and admission data (all patients)**

|                                               | Both decades<br>(n = 597) | 1 <sup>st</sup> decade<br>(n = 243) | 2 <sup>nd</sup> decade<br>(n = 354) | p value<br>(1 <sup>st</sup> vs. 2 <sup>nd</sup><br>decade) |
|-----------------------------------------------|---------------------------|-------------------------------------|-------------------------------------|------------------------------------------------------------|
| <u>Demographics and chronic comorbidities</u> |                           |                                     |                                     |                                                            |
| Age on admission (years)                      | 59 (49-68)                | 59 (47.5-69)                        | 59.5 (51-68)                        | 0.69                                                       |
| Female gender                                 | 181 (30)                  | 67 (28)                             | 114 (32)                            | 0.26                                                       |
| Body mass index (kg/m <sup>2</sup> )          | 28.1 (24.9-32.0)          | 28.2 (24.7-31.2)                    | 28.0 (25.0-32.1)                    | 0.76                                                       |
| Body surface area (m <sup>2</sup> )           | 2.04 (1.88-2.20)          | 2.06 (1.89-2.20)                    | 2.04 (1.87-2.19)                    | 0.46                                                       |
| NYHA class                                    |                           |                                     |                                     |                                                            |
| I or II                                       | 418 (77)                  | 106 (52)                            | 312 (92)                            | < 0.001                                                    |
| III or IV                                     | 122 (23)                  | 96 (48)                             | 26 (7.7)                            |                                                            |
| CAD                                           | 104 (18)                  | 51 (22)                             | 53 (16)                             | 0.08                                                       |
| History of MI                                 | 34 (5.7)                  | 16 (6.7)                            | 18 (5.1)                            | 0.53                                                       |
| Previous cardiac surgery                      | 64 (11)                   | 35 (14)                             | 29 (8.2)                            | 0.02                                                       |
| Hypertension                                  | 426 (72)                  | 173 (72)                            | 253 (71)                            | 1                                                          |
| COPD                                          | 54 (9.1)                  | 21 (8.7)                            | 33 (9.3)                            | 0.90                                                       |
| Smoking status                                |                           |                                     |                                     |                                                            |

|                                                |          |          |          |         |
|------------------------------------------------|----------|----------|----------|---------|
| Never smoker                                   | 267 (45) | 101 (42) | 166 (47) | 0.01    |
| Former smoker                                  | 153 (26) | 77 (32)  | 76 (22)  |         |
| Current smoker                                 | 170 (29) | 60 (25)  | 110 (31) |         |
| History of CVA                                 | 16 (2.7) | 5 (2.1)  | 11 (3.1) | 0.60    |
| Diabetes                                       | 36 (6.2) | 10 (4.3) | 26 (7.4) | 0.18    |
| Chronic kidney disease                         | 28 (4.7) | 14 (5.8) | 14 (4.0) | 0.39    |
| End-stage renal disease<br>on chronic dialysis | 13 (2.2) | 8 (3.3)  | 5 (1.4)  | 0.20    |
| PVOD                                           | 70 (12)  | 24 (9.9) | 46 (13)  | 0.30    |
| Connective tissue<br>disorder                  | 32 (5.4) | 16 (6.6) | 16 (4.5) | 0.36    |
| <u>Clinical condition on admission</u>         |          |          |          |         |
| Cardiogenic shock                              | 51 (8.8) | 13 (5.7) | 38 (11)  | 0.053   |
| Acute MI                                       | 19 (3.2) | 5 (2.1)  | 14 (4.0) | 0.29    |
| Tamponade                                      | 48 (8.1) | 12 (5.0) | 36 (10)  | 0.03    |
| Pre-operative CPR                              | 16 (2.7) | 11 (4.5) | 5 (1.4)  | 0.04    |
| Aortic insufficiency                           |          |          |          |         |
| None                                           | 158 (28) | 73 (31)  | 85 (26)  | < 0.001 |

|                                                |               |               |               |      |
|------------------------------------------------|---------------|---------------|---------------|------|
| Trace/trivial                                  | 64 (11)       | 22 (9.4)      | 42 (13)       |      |
| Mild                                           | 108 (19)      | 28 (12)       | 80 (25)       |      |
| Moderate                                       | 95 (17)       | 37 (16)       | 58 (18)       |      |
| Severe                                         | 134 (24)      | 74 (32)       | 60 (18)       |      |
| Acute stroke                                   | 34 (5.7)      | 9 (3.7)       | 25 (7.1)      | 0.12 |
| Acute paralysis                                | 15 (2.5)      | 7 (2.9)       | 8 (2.3)       | 0.83 |
| Serum creatinine on admission (mg/dL) *        | 1.0 (0.8-1.4) | 1.1 (0.9-1.4) | 1.0 (0.8-1.3) | 0.04 |
| GFR on admission (mL/min/1.73 m <sup>2</sup> ) | 87 (64-117)   | 89 (62-120)   | 86 (65-115)   | 0.81 |
| Pre-operative AKI                              | 125 (21)      | 62 (26)       | 63 (18)       | 0.03 |
| Pre-operative AKI requiring new dialysis       | 5 (0.8)       | 2 (0.8)       | 3 (0.8)       | 1    |

---

Data expressed as number (percentage) or median (interquartile range).

AKI = acute kidney injury; CAD = coronary artery disease; COPD = chronic obstructive pulmonary disease; CPR = cardiopulmonary resuscitation; CVA = cerebrovascular accident; GFR = glomerular filtration rate as estimated using the Cockcroft-Gault formula; MI = myocardial infarction; NYHA = New York Heart Association; PVOD = peripheral vascular occlusive disease.

\* 1 mg/dL = 88.42  $\mu$ mol/L

**Table S3. Intra-operative variables (only patients who underwent open repair)**

|                                                  | Both decades<br>(n = 545) | 1 <sup>st</sup> decade<br>(n = 213) | 2 <sup>nd</sup> decade<br>(n = 332) | p value<br>(1 <sup>st</sup> vs. 2 <sup>nd</sup><br>decade) |
|--------------------------------------------------|---------------------------|-------------------------------------|-------------------------------------|------------------------------------------------------------|
| Previous cardiac surgery<br>(reoperation)        | 54 (9.9)                  | 29 (14)                             | 25 (7.5)                            | 0.03                                                       |
| Aortic root procedure                            |                           |                                     |                                     | 0.34                                                       |
| None                                             | 55 (10)                   | 26 (12)                             | 29 (8.7)                            |                                                            |
| Aortic root replacement                          | 185 (34)                  | 77 (36)                             | 108 (33)                            |                                                            |
| Aortic root repair                               | 295 (54)                  | 107 (50)                            | 188 (57)                            |                                                            |
| Aortic valve replacement only                    | 10 (1.8)                  | 3 (1.4)                             | 7 (2.1)                             |                                                            |
| Arch procedure (branch vessel<br>reimplantation) |                           |                                     |                                     | 0.03                                                       |
| None                                             | 37 (6.8)                  | 15 (7.0)                            | 22 (6.6)                            |                                                            |
| Transverse arch (0 branch vessels)               | 318 (58)                  | 116 (54)                            | 202 (61)                            |                                                            |
| Zone 1 arch (1-2 branch vessels)                 | 40 (7.3)                  | 11 (5.2)                            | 29 (8.7)                            |                                                            |
| Zone 2 arch (2-3 branch vessels)                 | 109 (20)                  | 47 (22)                             | 62 (19)                             |                                                            |
| Zone 3 arch (3-4 branch vessels)                 | 41 (7.5)                  | 24 (11)                             | 17 (5.1)                            |                                                            |

|                                  |               |               |               |         |
|----------------------------------|---------------|---------------|---------------|---------|
| Frozen elephant trunk            | 33 (6.1)      | 6 (2.8)       | 27 (8.1)      | 0.02    |
| CPB time (minutes)               | 222 (181-272) | 226 (180-275) | 219 (181-271) | 0.86    |
| Cross clamp time (minutes)       | 156 (115-201) | 170 (125-213) | 142 (111-192) | 0.002   |
| HCA used                         | 515 (94)      | 199 (93)      | 316 (95)      | 0.49    |
| HCA time (minutes)               | 35 (28-45)    | 42 (33-51)    | 31 (25-39)    | < 0.001 |
| Type of cerebral perfusion       |               |               |               |         |
| ACP only                         | 169 (32)      | 11 (5.5)      | 158 (48)      | < 0.001 |
| RCP only                         | 191 (36)      | 84 (42)       | 107 (32)      |         |
| Both ACP and RCP                 | 139 (26)      | 89 (45)       | 50 (15)       |         |
| Neither                          | 31 (5.8)      | 15 (7.5)      | 16 (4.8)      |         |
| Concomitant procedures           |               |               |               |         |
| CABG                             | 32 (5.9)      | 16 (7.5)      | 16 (5.1)      | 0.26    |
| Mitral valve procedure           | 3 (0.6)       | 1 (0.5)       | 2 (0.6)       | 1       |
| Tricuspid valve procedure        | 7 (1.3)       | 2 (0.9)       | 5 (1.5)       | 0.71    |
| Intra-operative PRBC transfusion | 414 (80)      | 178 (95)      | 236 (72)      | < 0.001 |
| PRBC units transfused            | 4 (1-8)       | 6 (4-10)      | 3 (0-6)       | < 0.001 |

Data expressed as number (percentage) or median (interquartile range).



ACP = antegrade cerebral perfusion; CABG = coronary artery bypass graft; CPB = cardiopulmonary bypass; HCA = hypothermic circulatory arrest; PRBC = packed red blood cells; RCP = retrograde cerebral perfusion.

**Table S4. Post-operative outcomes (only patients who underwent open repair)**

|                              | Both decades<br>(n = 545) | 1 <sup>st</sup> decade<br>(n = 213) | 2 <sup>nd</sup> decade<br>(n = 332) | p value<br>(1 <sup>st</sup> vs. 2 <sup>nd</sup><br>decade) |
|------------------------------|---------------------------|-------------------------------------|-------------------------------------|------------------------------------------------------------|
| Reoperation for bleeding     | 48 (8.8)                  | 24 (11)                             | 24 (7.3)                            | 0.15                                                       |
| Post-operative tamponade     | 11 (2.0)                  | 4 (1.9)                             | 7 (2.1)                             | 1                                                          |
| Myocardial infarction        | 6 (1.1)                   | 3 (1.4)                             | 3 (0.9)                             | 0.68                                                       |
| Atrial fibrillation          | 193 (35)                  | 74 (35)                             | 119 (36)                            | 0.84                                                       |
| DSWI                         | 13 (2.4)                  | 11 (5.2)                            | 2 (0.6)                             | 0.002                                                      |
| New-onset CVA                | 38 (7.0)                  | 10 (4.7)                            | 28 (8.4)                            | 0.13                                                       |
| New-onset paraplegia         | 4 (0.7)                   | 1 (0.5)                             | 3 (0.9)                             | 1                                                          |
| Prolonged ventilation        | 84 (15)                   | 76 (36)                             | 8 (2.4)                             | < 0.001                                                    |
| Pneumonia                    | 97 (18)                   | 43 (20)                             | 54 (16)                             | 0.30                                                       |
| Reintubation                 | 36 (6.6)                  | 14 (6.6)                            | 22 (6.6)                            | 1                                                          |
| Tracheostomy                 | 19 (3.5)                  | 13 (6.1)                            | 6 (1.8)                             | 0.02                                                       |
| Post-operative renal failure | 94 (17)                   | 42 (20)                             | 52 (16)                             | 0.28                                                       |
| Requiring dialysis           | 52 (9.6)                  | 23 (11)                             | 29 (8.8)                            | 0.52                                                       |
| Post-operative LOS (days)    | 10 (7-17)                 | 12 (7-20)                           | 10 (7-15)                           | 0.02                                                       |

|                                      |          |          |          |      |
|--------------------------------------|----------|----------|----------|------|
| Intraoperative death                 | 7 (1.3)  | 6 (2.8)  | 1 (0.3)  | 0.02 |
| In-hospital mortality                | 44 (8.1) | 21 (9.9) | 23 (6.9) | 0.29 |
| 30-day mortality (after open repair) | 35 (6.4) | 17 (8.0) | 18 (5.4) | 0.31 |
| Operative mortality*                 | 47 (8.6) | 22 (10)  | 25 (7.5) | 0.33 |

Data expressed as number (percentage) or median (interquartile range).

CVA = cerebrovascular accident; DSWI = deep sternal wound infection; LOS = length of stay.

\* Operative mortality was defined as in-hospital mortality or mortality within 30 days after open repair.

**Table S5. Detailed cause of death in patients with organ failure after endovascular procedures by interventional radiology (IR), but before open repair or discharge**

| Case | Year of Treatment | Type of Malperfusion                               | Cause of Death                                                                                 |
|------|-------------------|----------------------------------------------------|------------------------------------------------------------------------------------------------|
|      |                   | <i>First Decade</i>                                |                                                                                                |
| 1    | 1996              | Cerebral, Spinal, Renal, Lower Extremity           | Brain death                                                                                    |
| 2    | 1997              | Celiac/hepatic, Renal                              | Unarousable; withdrawal of care                                                                |
| 3    | 1997              | Renal                                              | Respiratory failure; withdrawal of care                                                        |
| 4    | 2000              | Mesenteric, Renal, Lower Extremity                 | Renal failure, lower extremity necrosis                                                        |
| 5    | 2002              | Mesenteric, Renal, Lower Extremity                 | Extensive necrotic bowel                                                                       |
| 6    | 2003              | Cerebral, Mesenteric, Renal, Lower Extremity       | Fixed and dilated pupil, renal failure, respiratory failure, shock                             |
| 7    | 2003              | Mesenteric, Celiac/hepatic, Renal, Lower Extremity | Necrotic lower extremity, shock, acidosis, renal failure, respiratory failure, hepatic failure |

|    |      |                                                              |                                                                                 |
|----|------|--------------------------------------------------------------|---------------------------------------------------------------------------------|
| 8  | 2003 | Celiac/hepatic, Renal, Lower Extremity                       | Global cerebral ischemia, brain death                                           |
| 9  | 2004 | Cerebral, Lower Extremity                                    | Diffuse cerebral edema, brain herniation, brain death                           |
| 10 | 2005 | Spinal, Mesenteric, Renal, Lower Extremity                   | Shock; withdrawal of care                                                       |
| 11 | 2005 | Lower Extremity                                              | Respiratory failure, withdrawal of care                                         |
| 12 | 2006 | Mesenteric                                                   | Inoperable necrotic bowel                                                       |
| 13 | 2006 | Cerebral, Mesenteric                                         | Stroke, arrhythmia                                                              |
| 14 | 2006 | Mesenteric, Lower Extremity                                  | Extensive bowel necrosis, severe acidosis and hyperkalemia                      |
| 15 | 2007 | Mesenteric, Celiac/hepatic, Renal                            | Renal failure, respiratory failure, pneumonia, withdrawal of care               |
| 16 | 2007 | Cerebral, Mesenteric, Celiac/hepatic, Renal, Lower Extremity | Large cerebral infarction, cerebral edema, brain herniation, withdrawal of care |
|    |      | <u>Second decade</u>                                         |                                                                                 |
| 17 | 2008 | Cerebral, Spinal, Mesenteric, Renal, Lower Extremity         | Large stroke, withdrawal of care                                                |

|    |      |                                    |                                                                                          |
|----|------|------------------------------------|------------------------------------------------------------------------------------------|
| 18 | 2008 | Cerebral, Mesenteric, Renal        | Extensive stroke, withdrawal of care                                                     |
| 19 | 2009 | Mesenteric, Celiac/hepatic         | Renal failure, liver failure, shock                                                      |
| 20 | 2009 | Cerebral, Upper Extremity          | Large stroke, respiratory failure, withdrawal of care                                    |
| 21 | 2011 | Mesenteric, Renal, Lower Extremity | Respiratory failure, renal failure, sepsis, necrotic bowel, shock                        |
| 22 | 2011 | Cerebral, Mesenteric, Renal        | Severe large stroke, necrotic bowel, renal failure, brain herniation, withdrawal of care |
| 23 | 2012 | Cerebral, Mesenteric, Renal        | Liver injury, sepsis, shock, diffuse brain infarction                                    |
| 24 | 2015 | Mesenteric                         | Shock, acidosis, renal failure                                                           |
| 25 | 2016 | Renal, Lower Extremity             | Arrhythmia; withdrawal of care                                                           |
| 26 | 2016 | Renal, Lower Extremity             | Renal failure, extremity ischemia, respiratory failure; withdrawal of care               |
| 27 | 2016 | Mesenteric, Renal, Lower Extremity | Respiratory failure, renal failure, liver failure, necrotic bowel                        |
| 28 | 2016 | Cerebral, Mesenteric, Renal        | Necrotic bowel, lower extremity ischemia, arrhythmia                                     |

|    |      |                                       |                                                           |
|----|------|---------------------------------------|-----------------------------------------------------------|
| 29 | 2016 | Mesenteric, Renal, Lower<br>Extremity | Bilateral lower extremity necrosis,<br>refused amputation |
|----|------|---------------------------------------|-----------------------------------------------------------|

IR = interventional radiology (endovascular treatment).

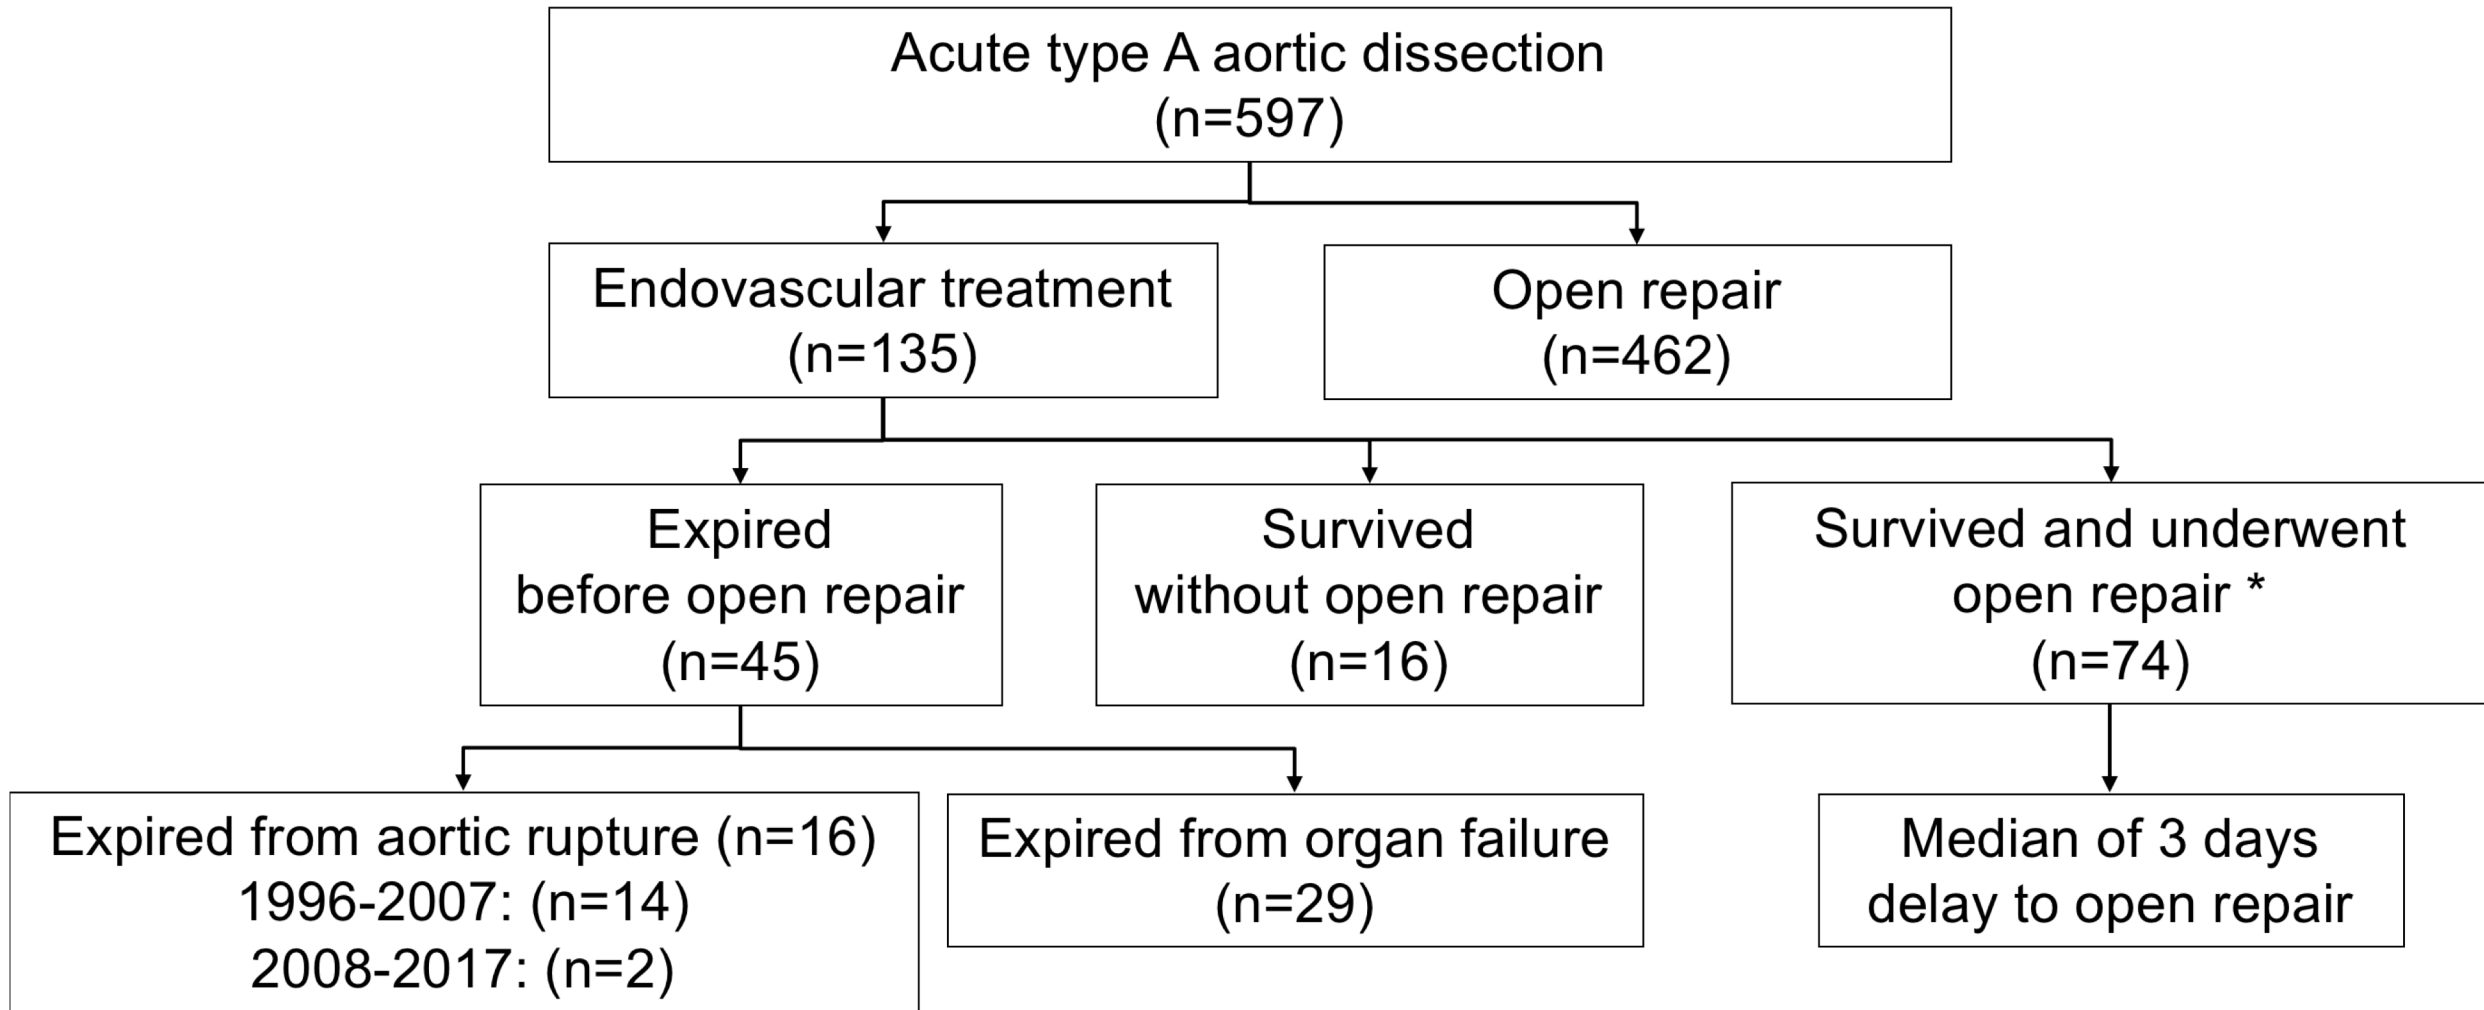

**Figure S1.** Actual clinical experience. Total 597 patients with acute type A aortic dissection treated at the University of Michigan from 1996-2017.



All patients with ATAAD (n)
  Patients with IR-amenable MPS (upfront IR) (n)
  Patients with IR-amenable MPS (upfront IR) (% of all)

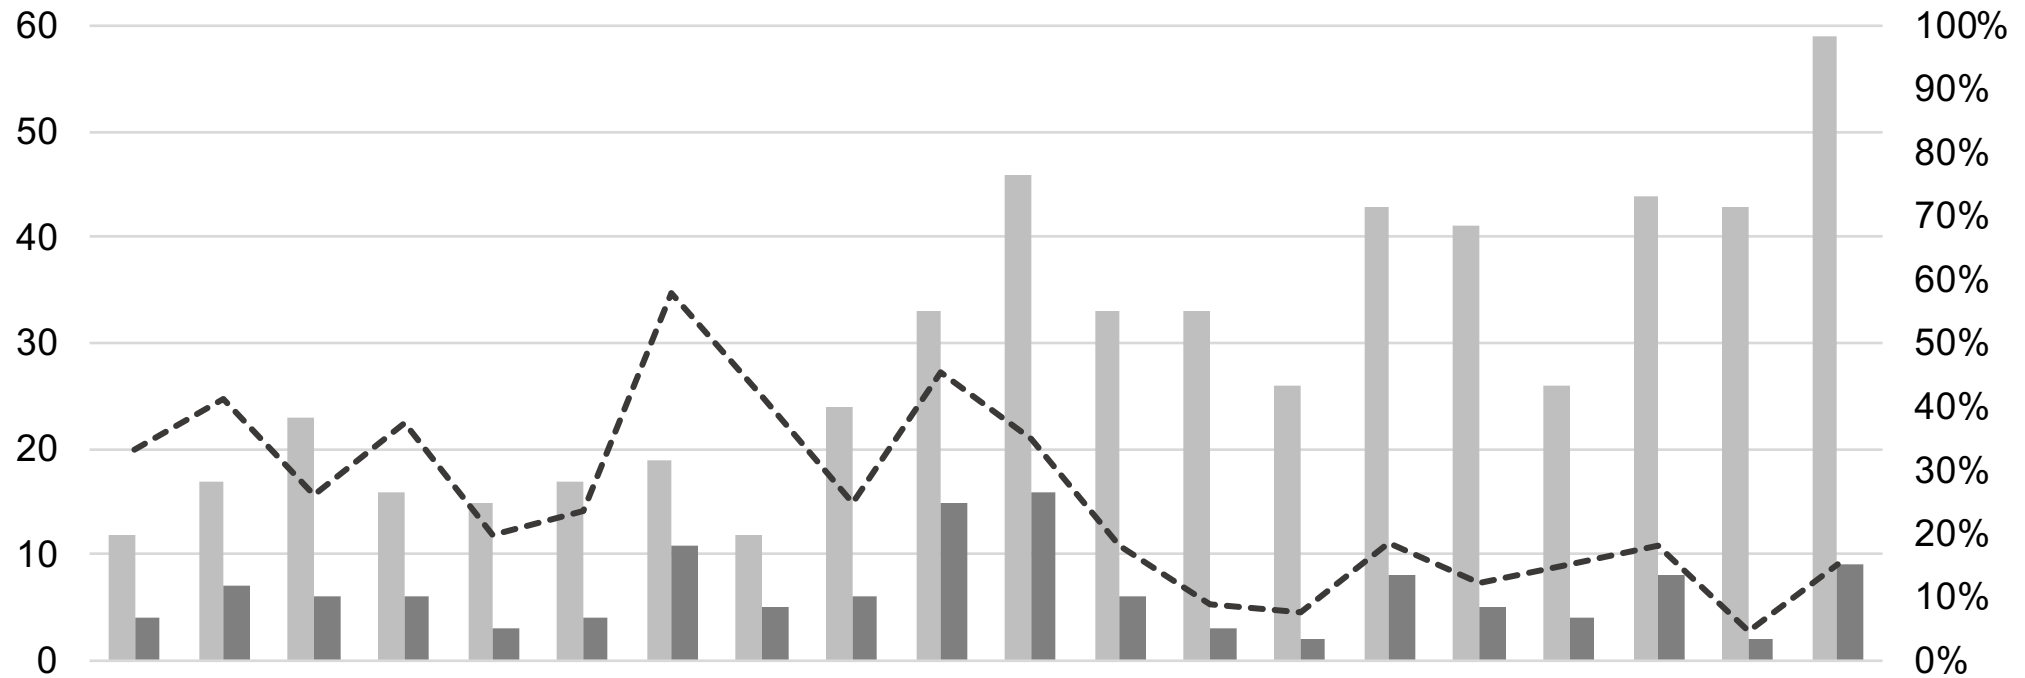

Year  
 1997 1998 1999 2000 2001 2002 2003 2004 2005 2006 2007 2008 2009 2010 2011 2012 2013 2014 2015 2016  
 Non-therapeutic IR/all IR 4/4 2/7 0/6 2/6 0/3 1/4 2/11 3/5 1/6 1/15 1/16 0/6 0/3 1/2 2/8 0/5 1/4 0/8 0/2 0/9

**Figure S2.** Clinical volume and patient selection over time. *Light gray bars:* number of patients of acute type A aortic dissection (ATAAD) per year. *Dark gray bars:* number of ATAAD patients who underwent upfront IR for visceral and/or extremity malperfusion syndrome (MPS) per year. *Dotted line:* % of MPS patients treated by IR over all ATAAD patients. ATAAD = acute type A aortic dissection; IR = interventional radiology (for endovascular treatment); MPS = malperfusion syndrome.

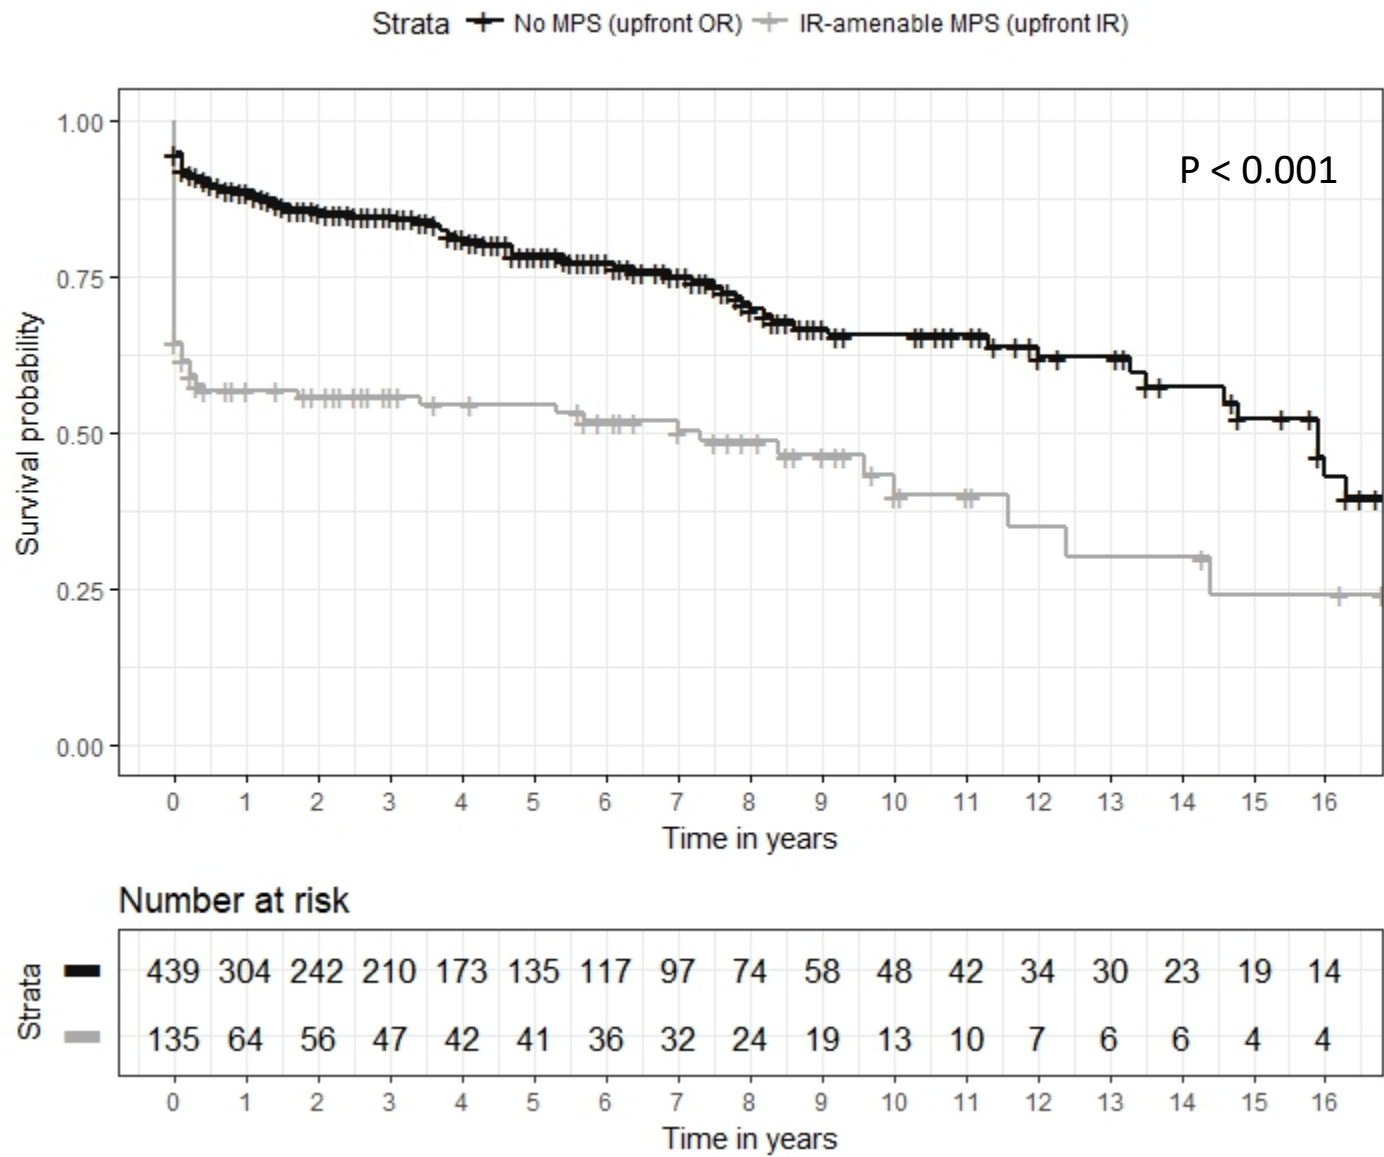

**Figure S3.** Long-term survival of patients with acute type A aortic dissection with or without malperfusion syndrome (MPS). Overall Kaplan-Meier survival since hospital admission for patients without any MPS who underwent upfront open repair (OR) (*black*) vs. patients who underwent upfront interventional radiology (IR) for IR-amenable (i.e. visceral and/or extremity) MPS (*gray*). Survival curves are truncated at 16 years. MPS = malperfusion syndrome.
