# Supplementary material
Source: PubMed Central journal article supplement (PMC6339462)

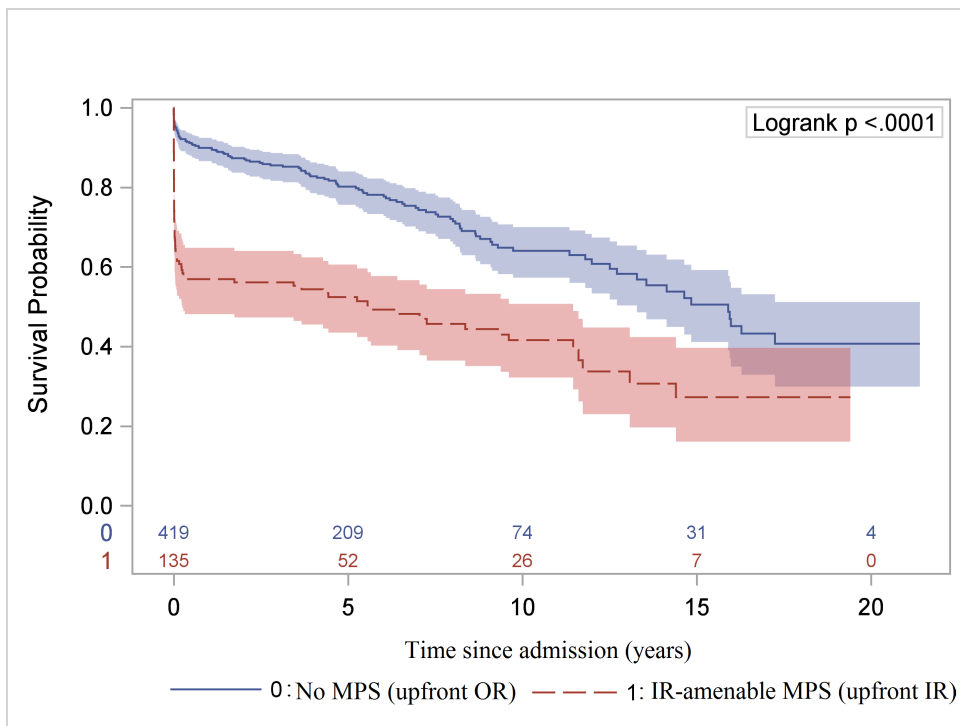

Supplement: NIHMS1507646-supplement-Supplemental_Figure_S3.pdf [file NIHMS1507646-supplement-Supplemental_Figure_S3.pdf]
